# Supplementary material for: Complete Chloroplast Genome of the Inverted Repeat-Lacking Species Vicia bungei and Development of Polymorphic Simple Sequence Repeat Markers
Source: PubMed Central journal article supplement (PMC9149428; doi:10.3389/fpls.2022.891783), 2022-05-16
Supplement: Image_1.pdf [file Image_1.pdf]

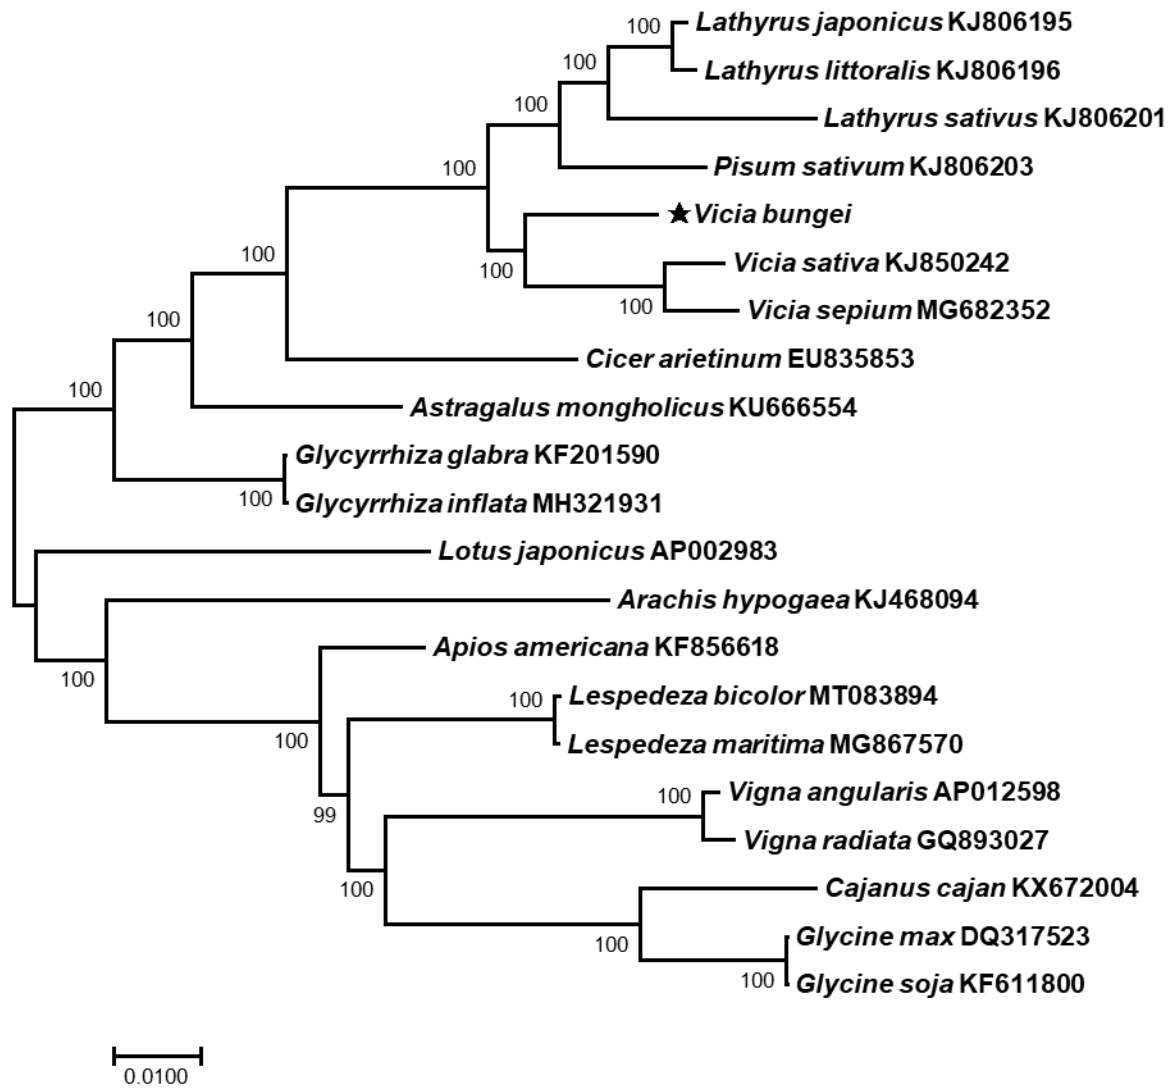

Fig. S1. Maximum-likelihood tree of *Vicia bungei* and 20 other Fabaceae species
