# Supplementary material for: Complete Chloroplast Genome of the Inverted Repeat-Lacking Species Vicia bungei and Development of Polymorphic Simple Sequence Repeat Markers
Source: PubMed Central journal article supplement (PMC9149428; doi:10.3389/fpls.2022.891783), 2022-05-16
Supplement: Image_3.pdf [file Image_3.pdf]

A

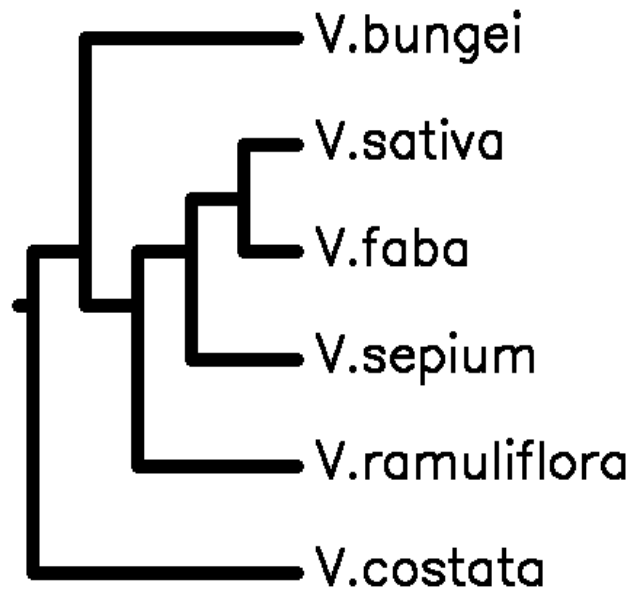

B

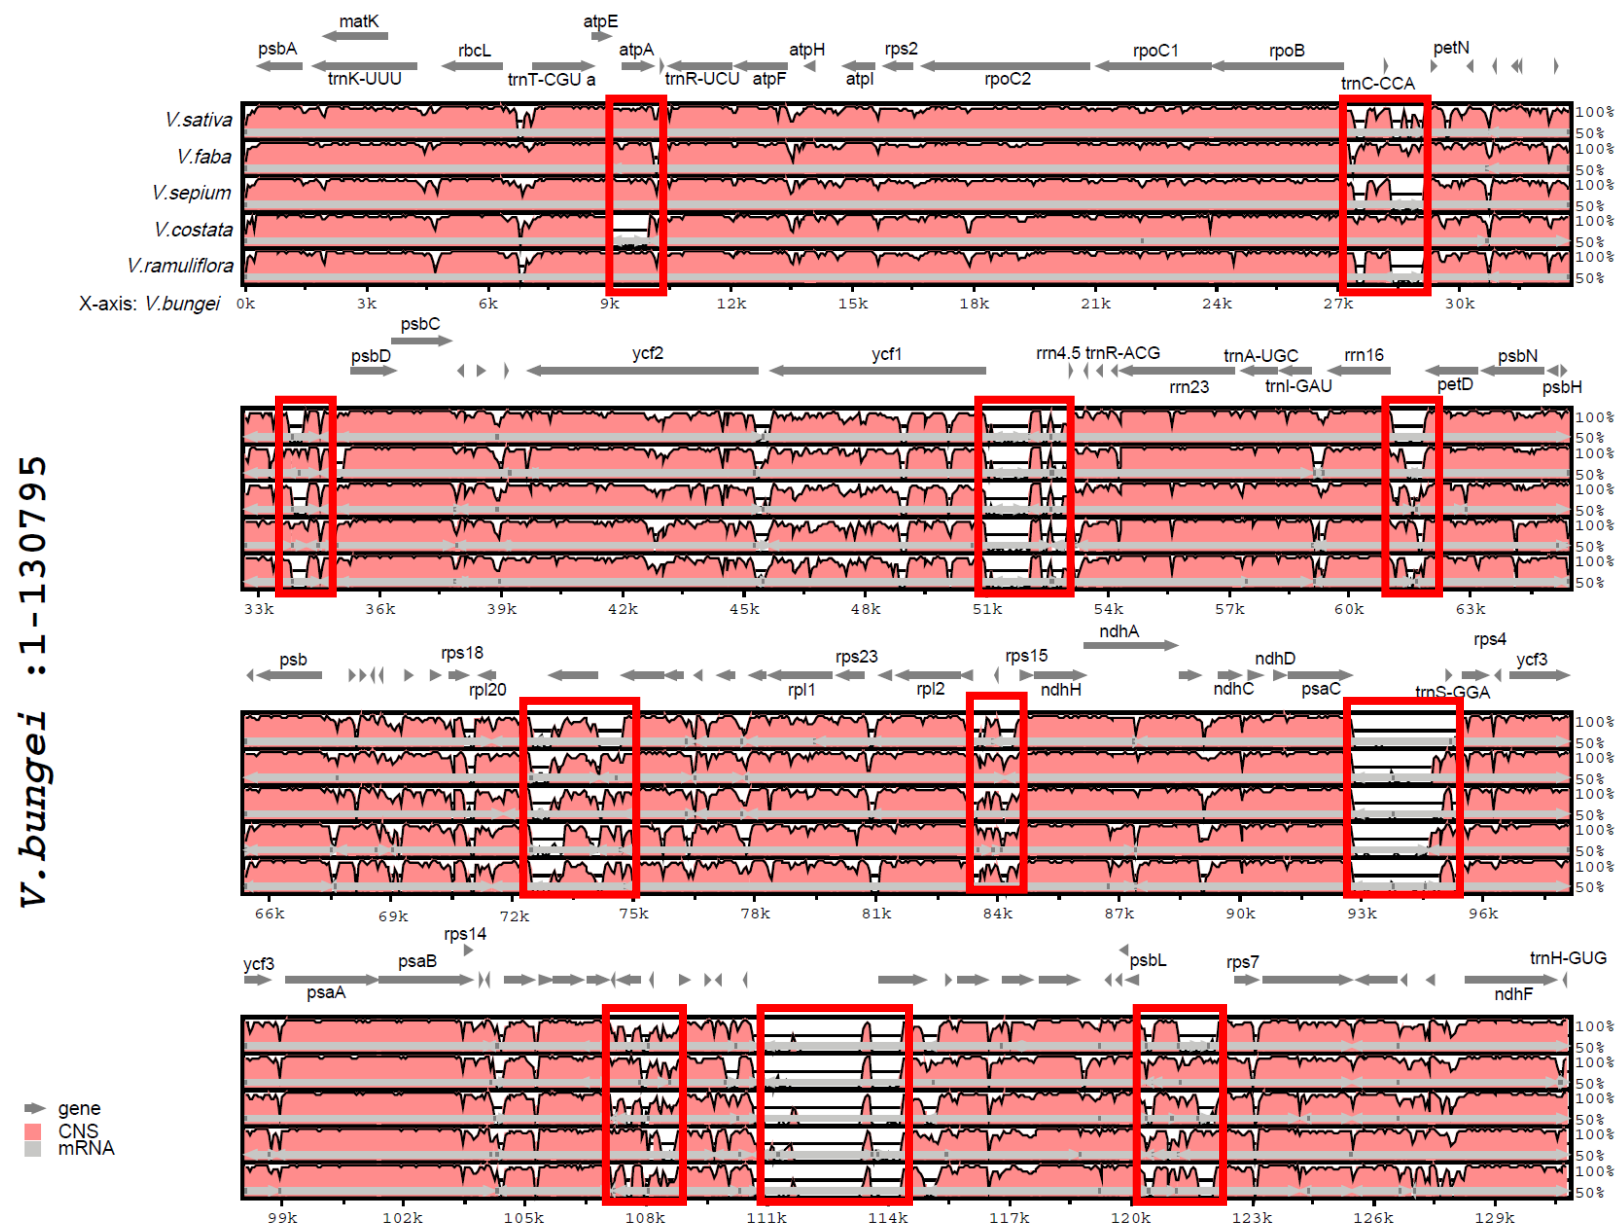

Fig. S3. Comparison of *Vicia* six species chloroplast genome. (A) phylogenetic tree based on the sequence alignment of the chloroplast genome of 6 *Vicia* species showed that *V. bungei* is far from reported other *Vicia* species. (B) Multiple alignments of chloroplast genome sequences of six *Vicia* species, each with that of *V. bungei*. Red blocks: major variant regions in chloroplast genome
