# Supplementary material for: Complete Chloroplast Genome of the Inverted Repeat-Lacking Species Vicia bungei and Development of Polymorphic Simple Sequence Repeat Markers
Source: Front Plant Sci. 2022 May 16;13:891783. doi: 10.3389/fpls.2022.891783 (PMC9149428; doi:10.3389/fpls.2022.891783)
Supplement: Supplementary file 5 [file Table_2.xlsx]

## Sheet: Table S1
Table S2. General features of the Vicia bungei chloroplast genome
Feature
Genome size (bp)	130796
GC content (%)	34.7
Total number of genes	107
Protein-coding genes	75
No. of rRNA genes	4
No. of tRNA genes	28
Total introns	17
Single intron (gene)	10
Two introns (gene)	1
Single intron (tRNA)	6
