# Supplementary material for: Complete Chloroplast Genome of the Inverted Repeat-Lacking Species Vicia bungei and Development of Polymorphic Simple Sequence Repeat Markers
Source: Front Plant Sci. 2022 May 16;13:891783. doi: 10.3389/fpls.2022.891783 (PMC9149428; doi:10.3389/fpls.2022.891783)
Supplement: Supplementary file 6 [file Table_3.xlsx]

## Sheet: Sheet1
Table S3. Distributions of the SSRs identiﬁed from the Vicia bungei chloroplast genome
SSR motif	Nucleotide	Number of repeats	Start (bp)	End (bp)	Location
Mono-	A	10	6922	6931	rbcL~atpB
			27475	27484	rpoB~trnC-GCA
			49381	49390	ycf1
			70383	70392	rpl33~rps18
			70788	70797	rps18
			70875	70884	rps18~rpl20
			70897	70906	rps18~rpl20
			79147	79156	rpl16~rpl16
			89010	89019	ndhI~ndhG
			127749	127758	rpl32~ndhF
		11	4266	4276	trnK-UUU~rbcL
			4644	4654	trnK-UUU~rbcL
			7080	7090	rbcL~atpB
			29623	29633	petN~psbM
			64376	64386	petB~petB
			78311	78321	rpl14~rpl16
			84600	84610	rps15
			107269	107279	trnF-GAA~trnL-UAA
			108797	108807	trnQ-UUG~psbK
			129708	129718	ndhF
		12	16512	16523	rps2~rpoC2
			16527	16538	rps2~rpoC2
			115546	115557	psaI~ycf4
			127083	127094	trnL-UAG~rpl32
		14	70849	70862	rps18
			109690	109703	psbI~trnS-GCU
		15	84415	84429	trnM-CAU~rps15
		22	38862	38883	psbZ~trnL-CAA
	T	10	14637	14646	atpH~atpI
			30692	30701	psbM~trnD-GUC
			33446	33455	trnT-GGU~psbD
			44992	45001	ycf2
			48052	48061	ycf1
			71067	71076	rps18~rpl20
			90098	90107	ndhG~ndhE
			104401	104410	trnG-GCC~trnV-UAC
			109440	109449	psbK~psbI
			118875	118884	petA~psbJ
		11	2202	2212	matK
			48181	48191	ycf1
			65133	65143	psbH~psbN
			68878	68888	trnP-UGG~psaJ
			70959	70969	rps18~rpl20
			73413	73423	clpP~clpP
			73705	73715	clpP~clpP
			79694	79704	rpl16~rpl16
			96514	96524	trnS-GGA~ycf3
			127000	127010	trnL-UAG~rpl32
			127450	127460	rpl32
		12	7067	7078	rbcL~atpB
			28714	28725	trnC-GCA~petN
			30027	30038	petN~psbM
			79416	79427	rpl16~rpl16
			90021	90032	ndhG~ndhE
			110107	110118	trnS-GCU~trnM-CAU
		13	13814	13826	atpF~atpH
			18623	18635	rpoC2
			64237	64249	petB~petB
			64281	64293	petB~petB
		14	47441	47454	ycf1
			48199	48212	ycf1
			89454	89467	ndhI~ndhG
		15	46920	46934	ycf1
		16	128031	128046	rpl32~ndhF
Di-	AT	5	24685	24694	rpoB
			45563	45572	ycf2~ycf1
			89050	89059	ndhI~ndhG
			110715	110724	trnM-CAU~accD
			111109	111118	trnM-CAU~accD
	TA	5	20096	20105	rpoC2
		5	32663	32672	trnT-GGU~psbD
		5	45594	45603	ycf2~ycf1
		6	1904	1915	trnK-UUU~matK
		6	94580	94591	ndhD~trnT-UGU
		7	94660	94673	ndhD~trnT-UGU
		7	116775	116788	ycf4~cemA
		8	67650	67665	psbB~petL
	TC	5	48591	48600	ycf1
Tri-	ATA	4	27984	27995	rpoB~trnC-GCA
		4	108758	108769	trnQ-UUG~psbK
	GTT	4	51913	51924	ycf1~trnN-GUU
	TCT	4	50144	50155	ycf1
		6	50108	50125	ycf1
Tetra-	AACC	3	66240	66251	psbB
	TATT	3	92500	92511	ndhD
	TTTC	3	101825	101836	psaB
	ATTA	3	127974	127985	rpl32~ndhF
Penta-	AAAAC	2	88459	88468	ndhA~ndhI
	AAAAG	2	10258	10267	trnT-CGU~trnR-UCU
			97797	97806	ycf3~ycf3
			115627	115636	psaI~ycf4
	AAAAT	2	91132	91141	psaC~ndhD
			114970	114979	accD~psaI
	AAACA	2	105722	105731	ndhC~ndhK
	AAAGA	2	13328	13337	atpF
			42546	42555	ycf2
			104441	104450	trnG-GCC~trnV-UAC
			118121	118130	petA
	AAATG	2	82378	82387	rpl2~rpl2
	AACAA	2	27306	27315	rpoB~trnC-GCA
	AACCC	2	36039	36048	psbD
	AACTA	2	57252	57261	rrn23~trnA-UGC
	AACTC	2	1864	1873	trnK-UUU~matK
	AACTT	2	8570	8579	atpB
	AAGAA	2	71051	71060	rps18~rpl20
	AAGAT	2	64689	64698	petB~petB
	AAGGA	2	112943	112952	trnM-CAU~accD
	AAGTA	2	119031	119040	petA~psbJ
	AATAA	2	32528	32537	trnT-GGU~psbD
			37947	37956	psbC~trnS-UGA
		3	114939	114953	accD~psaI
	AATAG	2	29896	29905	petN~psbM
			78925	78934	rpl16~rpl16
			89177	89186	ndhI~ndhG
	AATCA	2	124378	124387	ndhB~ndhB
	AATGA	2	32035	32044	trnE-UUC~trnT-GGU
		2	39274	39283	trnL-CAA~ycf2
	AATGG	2	17743	17752	rpoC2
		2	64813	64822	petB~psbH
	AATTA	2	74104	74113	clpP~rpoA
	AATTC	2	102377	102386	psaB
		2	120389	120398	psbE~rps12
		2	130323	130332	ndhF
	AATTG	2	6933	6942	rbcL~atpB
	ACAAA	2	61706	61715	rrn16~petD
	ACATT	2	34436	34445	trnT-GGU~psbD
			103188	103197	psaB
	ACCAA	2	30571	30580	psbM~trnD-GUC
	ACTCA	2	67688	67697	psbB~petL
	AGAAA	2	111888	111897	trnM-CAU~accD
	AGAAG	2	65875	65884	psbB
	AGAAT	2	38886	38895	psbZ~trnL-CAA
	AGATA	2	68978	68987	trnP-UGG~psaJ
	AGATC	2	120191	120200	psbE~rps12
	AGTAA	2	65621	65630	psbT~psbB
	ATAAA	2	23867	23876	rpoC1
			71644	71653	rpl20~rps12
			93154	93163	ndhD~trnT-UGU
			94144	94153	ndhD~trnT-UGU
	ATAAG	2	115666	115675	psaI~ycf4
	ATAAT	2	14120	14129	atpH~atpI
	ATACA	2	121377	121386	psbE~rps12
	ATACT	2	69796	69805	psaJ~rpl33
	ATAGA	2	98969	98978	ycf3~psaA
			115215	115224	accD~psaI
	ATATC	2	104131	104140	trnG-GCC~trnV-UAC
			107869	107878	trnL-UAA~trnQ-UUG
	ATCAT	2	35229	35238	trnT-GGU~psbD
			90532	90541	ndhE~psaC
			90613	90622	ndhE~psaC
			108711	108720	trnQ-UUG~psbK
	ATCGA	2	93127	93136	ndhD~trnT-UGU
	ATCTT	2	52762	52771	ycf1~trnN-GUU
	ATGAT	2	31627	31636	trnE-UUC~trnT-GGU
	ATGCC	2	126686	126695	ccsA~trnL-UAG
	ATTCA	2	14356	14365	atpH~atpI
			119696	119705	psbL
	ATTCT	2	38850	38859	psbZ~trnL-CAA
			80277	80286	rps3
	ATTGA	2	77789	77798	rps8~rpl14
	ATTGG	2	79120	79129	rpl16~rpl16
	ATTTA	2	41175	41184	ycf2
	ATTTC	2	116008	116017	ycf4
	ATTTG	2	6462	6471	rbcL~atpB
			68058	68067	petL
			73964	73973	clpP
	ATTTT	2	19777	19786	rpoC2
			107101	107110	ndhJ~trnF-GAA
	CAAAA	2	18545	18554	rpoC2
			104263	104272	trnG-GCC~trnV-UAC
			107557	107566	trnL-UAA~trnL-UAA
	CAAAT	2	16670	16679	rps2~rpoC2
	CAACC	2	6513	6522	rbcL~atpB
	CAATA	2	53264	53273	trnN-GUU~trnR-ACG
	CAATC	2	42131	42140	ycf2
	CAATT	2	69218	69227	trnP-UGG~psaJ
	CACAT	2	100283	100292	psaA
	CAGAT	2	37829	37838	psbC~trnS-UGA
	CAGGA	2	39480	39489	trnL-CAA~ycf2
	CATAA	2	1937	1946	trnK-UUU~matK
			3771	3780	matK~trnK-UUU
			121994	122003	psbE~rps12
	CATTG	2	30208	30217	petN~psbM
			61809	61818	rrn16~petD
	CCAAT	2	50394	50403	ycf1
	CCATC	2	79263	79272	rpl16~rpl16
	CCCTT	2	61283	61292	rrn16~petD
	CGATT	2	42224	42233	ycf2
	CTAAC	2	120586	120595	psbE~rps12
			127939	127948	rpl32~ndhF
	CTAAG	2	71006	71015	rps18~rpl20
			83557	83566	rpl23~trnM-CAU
	CTATG	2	67323	67332	psbB~petL
	CTCCT	2	32949	32958	trnT-GGU~psbD
	CTTAT	2	37152	37161	psbC
	CTTCA	2	73213	73222	clpP~clpP
	CTTCG	2	60065	60074	rrn16
	CTTTT	2	15625	15634	atpI~rps2
			19265	19274	rpoC2
			107692	107701	trnL-UAA~trnL-UAA
	GAAAA	2	29987	29996	petN~psbM
			118392	118401	petA
	GAAAT	2	32832	32841	trnT-GGU~psbD
			44065	44074	ycf2
	GAACT	2	42057	42066	ycf2
			68537	68546	trnW-CCA
	GAATA	2	83107	83116	rpl23
			108063	108072	trnL-UAA~trnQ-UUG
	GAATG	2	23377	23386	rpoC1~rpoC1
			85843	85852	ndhH
	GAATT	2	69679	69688	psaJ~rpl33
			87680	87689	ndhA~ndhA
			113680	113689	trnM-CAU~accD
			119158	119167	petA~psbJ
			126627	126636	ccsA~trnL-UAG
	GAGAG	2	58729	58738	trnI-GAU~trnI-GAU
	GATGG	2	103243	103252	psaB
	GATTA	2	74123	74132	clpP~rpoA
	GCACT	2	13244	13253	atpF
	GGAAT	2	29183	29192	trnC-GCA~petN
	GGATA	2	2997	3006	matK
	GGGCA	2	101964	101973	psaB
	GGTAC	2	62122	62131	petD
	GGTTA	2	97045	97054	ycf3~ycf3
	GTACT	2	39418	39427	trnL-CAA~ycf2
	GTATA	2	30927	30936	trnD-GUC~trnY-GUA
	GTGAA	2	90067	90076	ndhG~ndhE
	GTTAG	2	75290	75299	rpoA
	GTTTA	2	105657	105666	ndhC
	GTTTC	2	69665	69674	psaJ~rpl33
	TAAAG	2	126821	126830	trnL-UAG~rpl32
	TAAGG	2	38346	38355	trnS-UGA~psbZ
	TAATA	2	62743	62752	petD~petD
	TAATG	2	52146	52155	ycf1~trnN-GUU
	TAATT	2	77616	77625	rps8~rpl14
	TACCA	2	82122	82131	rpl2~rpl2
	TACCC	2	31479	31488	trnY-GUA~trnE-UUC
	TACCT	2	110398	110407	trnS-GCU~trnM-CAU
	TAGAA	2	118944	118953	petA~psbJ
	TAGAT	2	33686	33695	trnT-GGU~psbD
			34036	34045	trnT-GGU~psbD
			34802	34811	trnT-GGU~psbD
			35152	35161	trnT-GGU~psbD
	TAGGG	2	69748	69757	psaJ~rpl33
	TAGTA	2	27428	27437	rpoB~trnC-GCA
	TATAA	2	67931	67940	psbB~petL
		2	73187	73196	clpP~clpP
	TATAT	2	97865	97874	ycf3~ycf3
			111419	111428	trnM-CAU~accD
			127211	127220	trnL-UAG~rpl32
	TATGC	2	100222	100231	psaA
	TATGT	2	81932	81941	rpl2
	TATTC	2	32973	32982	trnT-GGU~psbD
			94944	94953	ndhD~trnT-UGU
			111304	111313	trnM-CAU~accD
			115195	115204	accD~psaI
	TATTT	2	39685	39694	trnL-CAA~ycf2
			91159	91168	psaC~ndhD
	TCATC	2	109182	109191	psbK~psbI
	TCCGC	2	54411	54420	rrn23
	TCGAA	2	65702	65711	psbT~psbB
	TCGAT	2	51755	51764	ycf1~trnN-GUU
	TCGGG	2	39429	39438	trnL-CAA~ycf2
	TCTAA	2	6569	6578	rbcL~atpB
			22794	22803	rpoC1~rpoC1
	TCTAG	2	111775	111784	trnM-CAU~accD
	TCTAT	2	67437	67446	psbB~petL
	TCTTA	2	108412	108421	trnQ-UUG~psbK
	TCTTG	2	86227	86236	ndhA
	TCTTT	2	81482	81491	rps19~rpl2
	TGAAA	2	28441	28450	trnC-GCA~petN
			120218	120227	psbE~rps12
	TGAAT	2	45192	45201	ycf2
			88887	88896	ndhI
	TGATT	2	19231	19240	rpoC2
	TGCCC	2	15550	15559	atpI~rps2
	TGGAA	2	19131	19140	rpoC2
	TGGAT	2	38558	38567	psbZ
	TGTAA	2	106493	106502	ndhK~ndhJ
			127699	127708	rpl32~ndhF
			92877	92886	ndhD~trnT-UGU
			93867	93876	ndhD~trnT-UGU
	TTAAG	2	45311	45320	ycf2
			57630	57639	trnA-UGC~trnA-UGC
	TTAGA	2	46407	46416	ycf1
	TTATC	2	88571	88580	ndhI
	TTATT	2	29521	29530	petN~psbM
			73462	73471	clpP~clpP
	TTCAA	2	32069	32078	trnE-UUC~trnT-GGU
	TTCCT	2	52859	52868	ycf1~trnN-GUU
	TTCTA	2	10039	10048	trnT-CGU
			113113	113122	trnM-CAU~accD
	TTCTG	2	53234	53243	trnN-GUU~trnR-ACG
	TTCTT	2	33	42	start~psbA
			16625	16634	rps2~rpoC2
			83086	83095	rpl23
	TTGAA	2	90182	90191	ndhG~ndhE
	TTGAG	2	31964	31973	trnE-UUC~trnT-GGU
	TTGAT	2	30087	30096	petN~psbM
			107522	107531	trnL-UAA~trnL-UAA
	TTGGA	2	76551	76560	rpl36
	TTGTA	2	74498	74507	clpP~rpoA
	TTTAA	2	51010	51019	ycf1~trnN-GUU
	TTTAC	2	27212	27221	rpoB~trnC-GCA
	TTTAG	2	9087	9096	atpE~trnT-CGU
			95435	95444	trnT-UGU~rps4
			125430	125439	ndhB
	TTTAT	2	27124	27133	rpoB~trnC-GCA
			51728	51737	ycf1~trnN-GUU
			94994	95003	ndhD~trnT-UGU
	TTTCT	2	108537	108546	trnQ-UUG~psbK
	TTTGA	2	80204	80213	rps3
	TTTGG	2	39993	40002	ycf2
			101457	101466	psaB
	TTTGT	2	9625	9634	trnT-CGU~trnT-CGU
	TTTTA	2	95234	95243	trnT-UGU~rps4
			108653	108662	trnQ-UUG~psbK
			127859	127868	rpl32~ndhF
	TTTTC	2	42153	42162	ycf2
			109591	109600	psbI~trnS-GCU
Hexa-	AAAAAG	2	64462	64473	petB~petB
	AAAAAT	2	110257	110268	trnS-GCU~trnM-CAU
	AAAATA	2	126562	126573	ccsA~trnL-UAG
			126583	126594	ccsA~trnL-UAG
	AAAATG	2	48084	48095	ycf1
	AAAGAA	2	44165	44176	ycf2
			65601	65612	psbT~psbB
	AAATAG	2	9747	9758	trnT-CGU~trnT-CGU
	AAATAT	2	115350	115361	accD~psaI
	AATGCT	2	153	164	start~psbA
	AATTAA	2	27594	27605	rpoB~trnC-GCA
	AATTGA	2	84143	84154	trnM-CAU~rps15
	ACTAGA	2	70819	70830	rps18
	ACTCTT	2	109318	109329	psbK~psbI
	AGAAAA	2	121733	121744	psbE~rps12
	AGAGAA	2	85345	85356	ndhH
	AGCTAT	2	27701	27712	rpoB~trnC-GCA
	ATATAA	2	108623	108634	trnQ-UUG~psbK
	ATATCC	2	87443	87454	ndhA~ndhA
	ATATTC	2	28746	28757	trnC-GCA~petN
	ATCATT	2	40197	40208	ycf2
	ATCCTC	2	127830	127841	rpl32~ndhF
	ATCGGG	2	97155	97166	ycf3~ycf3
	ATGTAA	2	104613	104624	trnV-UAC~trnV-UAC
	ATTACT	2	84502	84513	trnM-CAU~rps15
	ATTCTA	2	98699	98710	ycf3~psaA
			109983	109994	trnS-GCU~trnM-CAU
	ATTTAA	2	1388	1399	psbA~trnK-UUU
	ATTTAT	2	44114	44125	ycf2
	CAGAAG	2	88018	88029	ndhA
	CCAAAA	2	66801	66812	psbB
	CCAATT	2	10857	10868	atpA
	CGCTTC	2	55891	55902	rrn23
	CGGGAG	2	11613	11624	atpA
	CTAAAA	2	77657	77668	rps8~rpl14
	CTCAAG	2	37268	37279	psbC
	CTTAAT	2	84393	84404	trnM-CAU~rps15
	CTTGAC	2	6596	6607	rbcL~atpB
	CTTGAT	2	19369	19380	rpoC2
	CTTTCA	2	31839	31850	trnE-UUC~trnT-GGU
	GAAAAA	2	73625	73636	clpP~clpP
			120965	120976	psbE~rps12
	GAATAT	2	6998	7009	rbcL~atpB
	GAATTC	2	77734	77745	rps8~rpl14
	GACTCT	2	124670	124681	ndhB~ndhB
	GAGGAA	2	114289	114300	accD
	GGAATT	2	91633	91644	ndhD
	GGTATT	2	92630	92641	ndhD
	GGTTTT	2	54027	54038	rrn5~rrn4.5
	GTAAAA	2	122023	122034	psbE~rps12
	TAAAGA	2	22750	22761	rpoC1~rpoC1
	TAAATG	2	47391	47402	ycf1
	TAAGTA	2	71712	71723	rpl20~rps12
	TAGGGA	2	68715	68726	trnW-CCA~trnP-UGG
	TAGTAT	2	127265	127276	trnL-UAG~rpl32
	TATATG	2	106684	106695	ndhJ
	TATCAA	2	45840	45851	ycf1
	TATCTA	2	80741	80752	rps3~rps19
	TATTGA	2	44897	44908	ycf2
			121690	121701	psbE~rps12
	TATTTC	2	4448	4459	trnK-UUU~rbcL
	TCAAAA	2	62641	62652	petD~petD
	TCAAAT	2	65676	65687	psbT~psbB
	TCAATT	2	29752	29763	petN~psbM
	TCAGTG	2	60284	60295	rrn16
	TCATAT	2	32316	32327	trnE-UUC~trnT-GGU
	TCATTA	2	49760	49771	ycf1
	TCCAAT	2	20051	20062	rpoC2
	TCCGTC	2	66137	66148	psbB
	TCGTAA	2	22609	22620	rpoC1
	TCTAAT	2	116474	116485	ycf4~cemA
	TCTCAC	2	45615	45626	ycf2~ycf1
	TCTTTT	2	26905	26916	rpoB
			49264	49275	ycf1
	TGAAAA	2	114880	114891	accD
	TGAATA	2	13467	13478	atpF~atpH
	TGCTAT	2	86709	86720	ndhA~ndhA
	TGTATT	2	108874	108885	psbK
	TGTGAG	2	53938	53949	rrn5~rrn4.5
	TGTTTA	2	46251	46262	ycf1
	TTAAAC	2	61360	61371	rrn16~petD
	TTAGAC	2	68421	68432	petG~trnW-CCA
	TTATAT	2	47264	47275	ycf1
	TTATGG	2	92985	92996	ndhD~trnT-UGU
			93975	93986	ndhD~trnT-UGU
	TTCGTT	2	117600	117611	cemA~petA
	TTCTAT	2	128141	128152	rpl32~ndhF
	TTCTCT	2	109424	109435	psbK~psbI
	TTTAAA	2	77233	77244	rps8
	TTTCAT	2	28775	28786	trnC-GCA~petN
	TTTCCA	2	18414	18425	rpoC2
	TTTCCC	2	29400	29411	petN
	TTTCTT	2	14318	14329	atpH~atpI
	TTTTAG	2	17618	17629	rpoC2
	TTTTTC	2	46644	46655	ycf1
			50021	50032	ycf1
			58645	58656	trnI-GAU~trnI-GAU
			74909	74920	rpoA
Complex repeated motifs	AAATA/AAGAA	2/2	14093	14112	atpH~atpI
	ATTGA/ATTGCA	2/2	10351	10371	trnR-UCU~atpA
	TAAAA/A	2/10	15562	15577	atpI~rps2
	T/TTTCT	13/2	18730	18749	rpoC2
	TAAAA/A	2/11	23165	23181	rpoC1~rpoC1
	GTTTT/TTTTGT	2/2	35410	35422	psbD
	TACTAT/TACTA	2/2	51955	51970	ycf1~trnN-GUU
	TTCATT/TTCTA	2/2	76918	76938	rpl36~rps8
	TTTCT/TTTTCT	2/2	86786	86801	ndhA~ndhA
	TA/TATCT	7/2	94621	94642	ndhD~trnT-UGU
	ATT/T	4/10	96815	96834	ycf3~ycf3
	TTCTA/TA	2/7	108565	108586	trnQ-UUG~psbK
	TTTGG/TGGTAA	2/2	109286	109304	psbK~psbI
	TATCT/TATC	2/3	109953	109969	trnS-GCU~trnM-CAU
