# Supplementary material for: Complete Chloroplast Genome of the Inverted Repeat-Lacking Species Vicia bungei and Development of Polymorphic Simple Sequence Repeat Markers
Source: Front Plant Sci. 2022 May 16;13:891783. doi: 10.3389/fpls.2022.891783 (PMC9149428; doi:10.3389/fpls.2022.891783)
Supplement: Supplementary file 7 [file Table_4.xlsx]

## Sheet: Sheet1
Table S4. Information of 232 primer sets and SSR loci in the Vicia bungei chloroplast genome
Primer no.	SSR motif	SSR sequence	Number of repeats	Location	Left sequence	Right sequence	Product size
VBCP1	Mono-	A	10	rpoB~trnC-GCA	AAATTTCACCTAGACTTCGGGT	ACTTGAAATGGTAAAGGGCTCA	224
VBCP2				ycf1	CAGTTCGAATTGCGTCCAATAA	TCACCCTTCATTCCAAATGAAAC	295
VBCP3				rps18~rpl20	AGCAAGTCGATTACTAGAACTAGA	AGCTTAGAATGAAACAACCTCAA	206
VBCP4				rpl16~rpl16	TAGAAGGTTCTAACGAATCCGT	TGATTCATTAGATGGGATGGCG	210
VBCP5			11	trnK-UUU~rbcL	CTACCGATGGTATGGATGAACC	AGAGTACTCTACTAAACAAGTCGT	262
VBCP6				rbcL~atpB	TTGAATTGGTTGGATGGTACCA	AGTACCGGACCTATTATTTGCG	263
VBCP7				petN~psbM	TTTCTAGCTGGGTTCTTCCA	CAATTATCTGTACTCCCGGGAC	214
VBCP8				rpl14~rpl16	CTCCGCTATTATCGGCTACATT	CAATTTCAATAGCGGCATCCAA	232
VBCP9				trnF-GAA~trnL-UAA	AGACAGAATAAATGAGTCGCCG	TCGACTTTAGAAATCGTGAGGG	233
VBCP10				ndhF	AATAGCTTGTTCCACCGCAG	CGATGTGAATATGTCCTCTCCC	249
VBCP11			12	rps2~rpoC2	CCATTCGAGGATTCCATTTCCT	AGAATGGCCTGATTATATCGGC	231
VBCP12				rps2~rpoC2	CCATTCGAGGATTCCATTTCCT	AGAATGGCCTGATTATATCGGC	231
VBCP13			14	psbI~trnS-GCU	CGTAATCCTGGACGTGAAGAAT	ACTAAAGCGTCGGATTGCTAAT	256
VBCP14			22	psbZ~trnL-CAA	GGGTCAAACTTCTTCTATTGGAA	TTGGTTCGATTTGAATTAGCCG	248
VBCP15		T	10	atpH~atpI	TCCATACCGTAAACCAATTCGT	TATGTGTGGCTCGCAATAATCT	273
VBCP16				ycf2	GAGCGGAACAATCAACCTATTG	CCCGTTCACATGGTTTAACAAG	227
VBCP17				ndhG~ndhE	ATAGGTGCAATTGTCGTAGCTC	ACAAGTACATGTTCGAGCATCA	268
VBCP18				trnG-GCC~trnV-UAC	AAAGGAGTGATCAGGACCCG	TAGCCCTTAATGCTTTGGATACA	235
VBCP19				psbK~psbI	AAGGCTCAACTCTTACTCTTACT	ATTCTTCACGTCCAGGATTACG	270
VBCP20			11	matK	TGCAAGAATTCTTCTGAACCAG	TTGTAATCTATTAGGGCAGCCC	246
VBCP21				ycf1	AATGGGTTTGGGACATGATCAT	CTCACAAGGAATTGCCAACAAA	223
VBCP22				psbH~psbN	CCCGGAGCTACTTTACCATATT	ATTAGGGTTGCTGTTTCCATGA	234
VBCP23				clpP~clpP	GCATACGGCTCTACTTTCAATT	GAAACTTTGGGATTGCTGAATCA	210
VBCP24				rpl16~rpl16	ATGAGATGACCCATAGACCTTT	ACTCATCGCTTCCCATTATCTG	226
VBCP25			12	rbcL~atpB	TTGAATTGGTTGGATGGTACCA	AGTACCGGACCTATTATTTGCG	263
VBCP26				petN~psbM	GACGCCATGGAATTGACATTC	ATGATCAGACTACAACCAGCAG	221
VBCP27			13	atpF~atpH	AGGCGAATCAGTCTGTTAATCC	GATTGCGAGACAACCGGAAG	259
VBCP28				rpoC2	TGATACTGTCCGGTATTTCATAGA	TCGAGTAGGCGGATTGGTCC	269
VBCP29				petB~petB	TAATGCCAAACTTTCAAGTCGG	TCGTGGTTATGGTATGAATCTCA	213
VBCP30				petB~petB	CCTTACCGGCCTCTTGAATATT	CAGCAGTTCTTACTCAGGGAAT	229
VBCP31			14	ycf1	AGGCTTGTGACAAAGAAGATACA	TCGCTGGCATTCGTATTCTTAT	240
VBCP32				ycf1	AATGGGTTTGGGACATGATCAT	CTCACAAGGAATTGCCAACAAA	223
VBCP33				ndhI~ndhG	TTTCGTATAAAGAGTGGAATGACA	AGACCTGATCCCAGAAAGACTA	219
VBCP34			15	ycf1	TGTTTGCTTGCAATGGTGATTT	AGAATCCATAAACATCGCGTGG	226
VBCP35	Di-	AT	5	rpoB	TATCAACGGGTCTTCCATCTTG	CGAGCTATACTTGGGATTCAGG	271
VBCP36			5	trnM-CAU~accD	CCGTTGTCCACTCGATCTTT	TTATTTCAGTCGACCACTACCC	243
VBCP37		TA	5	rpoC2	ATAACACAATCGGCAGATCCAA	TTCTGTAAACACCCGAAATGGA	229
VBCP38			6	trnK-UUU~matK	CACGGCTTTCCCTATGTATACA	TGCAGAGGTTCCATAGAAATCG	221
VBCP39			8	psbB~petL	TCAGTGAATACAGACAATGGATAC	ATCATCTGTGACATCTACGCAG	253
VBCP40		TC	5	ycf1	ATAGAATGCTCTCCCAAGCTTC	TTTCGAGATACTGGGCGACTA	215
VBCP41	Tetra-	AACC	3	psbB	AAAGGAACATCCGCTCTAACAA	ACATCGGTAATAATCCGGCAAA	208
VBCP42		ATTA		rpl32~ndhF	TCCTCATCCTCGCTCTATAGAT	TCTTTGCACAATGGTCCCAATA	286
VBCP43		TATT		ndhD	ATCAATGGCTTCTCTTGCATTG	CGAAATAAATAATTCTCTGGGCCC	253
VBCP44		TTTC		psaB	CGGTGTTTATCAGTGGTGGTAT	CAAGCTAAGGAACTGACTCCAA	216
VBCP45	Penta-	AAAAG	2	ycf3~ycf3	AGGCCTTATCCACACAAGTAAC	TTCTTTCTTTGCTACAGCTCGT	268
VBCP46		AAAAT		psaC~ndhD	CGACGGATTTCTTAAGTGTTCG	AAATTAAGGAACCTGCGGCTAT	269
VBCP47				accD~psaI	AGTGAGTTATTTGAGTTCCATGGT	GGAATGTCGAACCAAATAACTGG	261
VBCP48		AAACA		ndhC~ndhK	TAGAAGCTTTCATCTTCGTGCT	CATAGAGAAGCGGCCATAAACT	240
VBCP49		AAAGA		ycf2	CGAAATTCAATGATGTAGGATGGA	AGTCACCATTCATATCGACACA	208
VBCP50				trnG-GCC~trnV-UAC	ACGTACTATGTAACGATAGCGG	ACCTAACTGAGCTATAGCCCTT	217
VBCP51				petA	TTGAAGCAGTTGTTCGAATTCC	AACATCTCTCTTAGTAGCGGGA	290
VBCP52		AAATG		rpl2~rpl2	TTCATGTAGCATTCAGACCGAA	AAATTGTTTCAAGCACCGACAG	230
VBCP53		AACAA		rpoB~trnC-GCA	TCATTCTTCATCGAATCACATGA	ACCCGAAGTCTAGGTGAAATTT	224
VBCP54		AACCC		psbD	TTCATATGATGGGAGTTGCTGG	GAGCACTCATCCATAAACCAGT	264
VBCP55		AACTA		rrn23~trnA-UGC	GTATCCACCATAAGCCTTTCCT	CGCTTATCTCCAACTCGTTCAT	213
VBCP56		AACTT		atpB	CCCAGGGAAATATGTTGGTCTA	CTTTCACTTCTGAATCCCAAACA	228
VBCP57		AAGAT		petB~petB	CGGTTGCGAGGTCTAAATAGAA	CCGGAATTATGAGTGTGTGACT	210
VBCP58		AAGGA		trnM-CAU~accD	AGCGCCTTGAAGATGATCTAAA	CAGATCAGGGAAACTGTCCTTT	212
VBCP59		AAGTA		petA~psbJ	AACTGCACAATTCATTCGAACC	TTTGTTTGTCCCTTCCTTCACT	263
VBCP60		AATAA		psbC~trnS-UGA	TACATATTGGGTTGAGTCGAGC	GAGATGGCTGAGTGGTTGATAG	261
VBCP61			3	accD~psaI	TGACAAGGGCTTAGTTGATTCA	TTTGCCGTCTATTTCTACAAGAA	287
VBCP62		AATCA	2	ndhB~ndhB	GGTTCTCATCCTTCAGAGACTG	TTCGAGGAATCCTTCATCAGTG	201
VBCP63		AATGA		trnE-UUC~trnT-GGU	AAGAATTGAGTTGAGGGACAGG	ACATAGCAACTCATTAACGAACA	227
VBCP64				trnL-CAA~ycf2	CGAGTCCTCTTCAAGGCATAAT	GAGTGCCAAAGTCATTGAATGG	219
VBCP65		AATGG		rpoC2	TGAACTGTTATAACTTGACCCGA	TGGCAACTTGACAAATTAACTGA	266
VBCP66				petB~psbH	GCCATCTATCAAGATAAGATGACG	TCACAAGAACCAACTAACTAGCT	214
VBCP67		AATTC		psaB	AGAACTAACTTCGGTATTGGGC	AACGCAGCTTGAGTAGTAAAGT	239
VBCP68		ACAAA		rrn16~petD	AGAATCCGACTCCATATTCTTCA	CGATCCGACGAAATCATCCTTT	223
VBCP69		ACCAA		psbM~trnD-GUC	GGATCTCGATGATATCAAATCGGA	AGATCATTTCGAACAGGTATCCC	237
VBCP70		ACTCA		psbB~petL	AAAGTCTACGGGTCTTTCTTGG	TGAATCAATTATTACGGACGAACA	224
VBCP71		AGAAG		psbB	CTCCAAATTCTACTTGCGCATC	CGTGCTCAATTGGGTGAAATTT	214
VBCP72		AGAAT		psbZ~trnL-CAA	GGGTCAAACTTCTTCTATTGGAA	TTGGTTCGATTTGAATTAGCCG	248
VBCP73		AGATC		psbE~rps12	CGCAATGAATAGGGAGGGTATA	CGTTGCTGTGTTAGAATAAGGC	272
VBCP74		AGTAA		psbT~psbB	TCCTAAAGTCGAGACTAAGAGGA	AAACAGGGAGTCTGATAGAAGAA	257
VBCP75		ATAAA		rpoC1	CCCTACTGTTTCTCCATTAGGT	TTTGGCTCTGGAACTGAATCAT	201
VBCP76		ATAGA		ycf3~psaA	TAATAGATCCGAACACTTGCCC	AACATATACAAAGAGACCCGCC	219
VBCP77		ATCAT		ndhE~psaC	TATCGGACTGGCTATTGTTTCC	AGAGGGAATAGAAGAGGACCAG	236
VBCP78				ndhE~psaC	TCCTCAATTGCTCGTAACAGAA	AGAGGGAATAGAAGAGGACCAG	217
VBCP79		ATGAT		trnE-UUC~trnT-GGU	GAGATGTCCTAAACCGCTAGAC	AGATTGGTGATTGGAATGAACAA	204
VBCP80		ATGCC		ccsA~trnL-UAG	ACTCGGAATAGAAATAGGGAATTG	CGACGATTGACTAAAGAATTGGT	204
VBCP81		ATTCA		atpH~atpI	TTTCGTTTCTACCCTTGTAGTTT	ACGGTATGGAACAAACACATGT	255
VBCP82				psbL	TCCTTCCGAATGGGATAAGAGA	GCAGTTCATCCAACGATAAACC	206
VBCP83		ATTCT		psbZ~trnL-CAA	GGGTCAAACTTCTTCTATTGGAA	TTGGTTCGATTTGAATTAGCCG	248
VBCP84		ATTTA		ycf2	CTCGTACATTAGAACCCAGAGT	TTGAACTCTCTTTCCAGCGATT	262
VBCP85		ATTTG		rbcL~atpB	CAAGAACAAGGTCTACTCGACA	TCACTGTCAAGGTCAAGAGTCT	266
VBCP86				petL	CCTTATGCCCACTATAACCAGT	ATTGACCATGAATCTCAATGACC	200
VBCP87				clpP	GCATACTGTCTGTACTTCTGCT	ATGCCAAAGGTCCCGTATTTAA	273
VBCP88		ATTTT		rpoC2	TTGGTGGAATAATGACGTTATGT	TGGGAGAAGCTGTAGGGATTAT	267
VBCP89				ndhJ~trnF-GAA	GAAAGTTGGATAGGATGGCCTT	AAATTAGGATGGTGCGTCAAGA	278
VBCP90		CAAAA		rpoC2	TTGACAACTTTGAGTTCCAGATT	ACATAGTGCCATCTTGATACCG	231
VBCP91				trnG-GCC~trnV-UAC	ATCAATTCGATTTGTGCAGAGC	CCGCTATCGTTACATAGTACGT	231
VBCP92				trnL-UAA~trnL-UAA	GGTGGAGTGACTGATTTGATCA	GGATAGGTGCAGAGACTCAATG	202
VBCP93		CAATA		trnN-GUU~trnR-ACG	CGATTGGTCGTAGGTTCAAAT	ATAGGATAGCCCGAGACTGTAG	207
VBCP94		CAATC		ycf2	CTGTCGTTAAGGTAGAGAACTGA	CCAAATCCCATCAATCGAATCG	205
VBCP95		CACAT		psaA	TGAGATCCTAACAACGTCATGG	TGCATCACGATGTCTAAGAACA	283
VBCP96		CAGAT		psbC~trnS-UGA	TTTGAGCCTGTTCTTTCCATGA	ATTGATTTAGGTTGGCTCGGTT	224
VBCP97		CAGGA		trnL-CAA~ycf2	CCATTCAATGACTTTGGCACTC	TGAGAATCCATATTGCCGTTGA	238
VBCP98		CATAA		trnK-UUU~matK	CACGGCTTTCCCTATGTATACA	TGCAGAGGTTCCATAGAAATCG	221
VBCP99				matK~trnK-UUU	CCTCGCTTCTTCCTTCTCATTT	CGATTAGTGCTTGCTGTGGAAA	233
VBCP100		CATTG		petN~psbM	CTGCTGGTTGTAGTCTGATCAT	TCGCATTTATAGCTACTGCACT	207
VBCP101		CCAAT		ycf1	TGTTCTGCCTAAATAGTGTGCA	TTGTTGGGTGGTTAATTGGTCA	200
VBCP102		CCATC		rpl16~rpl16	GGCGAATATTGACCCTCTCATT	GAGAGGCTCCATTGTAGAATTGA	230
VBCP103		CCCTT		rrn16~petD	CCAGGCCTCTTATCTACTCAGA	GGCCCGAATTCAAGTTGTTTAA	235
VBCP104		CGATT		ycf2	TCACTATTCGAGATCCAGGATTC	TTTAGAAGAAAGGCGAGGTTCC	276
VBCP105		CTATG		psbB~petL	GCCGGGATCATTTAATACAACG	ACCATTGCGTATTGTTACTTATCG	263
VBCP106		CTTAT		psbC	ACATGTATGGTTGGGTTCCATT	AGTAAATGCTTGAGCTTGAGAAG	241
VBCP107		CTTCG		rrn16	GGACTTAACCCAACACCTCAC	TAGCTAACGCGTTAAGTATCCC	239
VBCP108		CTTTT		atpI~rps2	TGACCTACTTCCACAGCAGATA	TTTAGATTTGGTTGGGCGGG	282
VBCP109				rpoC2	CGTTCTTGAATCGATTGGAATGG	ACTTCGCAAGGATCAAGATCAA	276
VBCP110				trnL-UAA~trnL-UAA	TGAATGTTGTCAACTCCATTTGT	ACGCTACGGACTTAATTGGATT	216
VBCP111		GAAAA		petA	TCCCGCTACTAAGAGAGATGTT	CTGGTCCTGGCGGTATAATATC	233
VBCP112		GAAAT		trnT-GGU~psbD	TCCTTTCATTGTCAGATACTCCT	AGATTCTTGCAGAGTGAGAACC	201
VBCP113				ycf2	AACCTCAGACCAATCAATCGAA	AGTCAGAATAAATGCTTTGATCCT	213
VBCP114		GAACT		trnW-CCA	ATCTCAGAAGAATGGTATCACGC	TTGAGCGATTCAAATTGGACAT	213
VBCP115		GAATA		rpl23	GATTTCACTTGACTGTTGACGG	AAACATTGGGTCGAACTCTTCT	268
VBCP116		GAATG		rpoC1~rpoC1	AATTGACCATAGACCCATTCCC	CCTAGTTATATCGCGAGCCTTT	244
VBCP117		GAATT		psaJ~rpl33	TCTGTGATTAAATCCCTCTTCGT	ACAATTCCATTTCTGGTCTGACT	202
VBCP118				ndhA~ndhA	TGAGATCAATTCAGAAGTGCCT	GCTCCTGGAAAGCCTTAAGTAA	202
VBCP119				trnM-CAU~accD	TTCATCTTTATGCAGCAGAGGT	AGAACGATGTATCTCTTTCATCCT	227
VBCP120				petA~psbJ	CCTAGAGTCCGATTCCTTATTGT	GGTCCCGTTGAGTTCTTCATAA	206
VBCP121		GAGAG		trnI-GAU~trnI-GAU	TACGTTGTTAGGTGCTCCATTT	GAAACCAAACTTCTCCTCAGGA	229
VBCP122		GCACT		atpF	TTAGTAAGAAGTCATTCGCCGG	CTATCCATAAGAGGAGATGCGC	274
VBCP123		GGATA		matK	CCAATTACAAAGAAACAGCCGT	TCTTCCTTAGAGGAGGCAGAAA	219
VBCP124		GGGCA		psaB	CATATCCTTATTAGCGGGCTGG	AGCATAAAGATTCCACTGACCC	262
VBCP125		GGTAC		petD	AAAGACGGTTGTTGCTACTGG	TCTCGAACCATCAATGATTGGG	232
VBCP126		GGTTA		ycf3~ycf3	TCGTGTATTCCCGATTAATGCA	CTAGTTAGTCCCGATCCCGATA	224
VBCP127		GTATA		trnD-GUC~trnY-GUA	GACTCGAACCCGCAACTTCC	CGAGTCATCCGTGTCGATAAAG	215
VBCP128		GTTTA		ndhC	ACAGTCTTTCTTTACCCATGGG	TCAAGTAAGGGAAACTCAATGGA	209
VBCP129		GTTTC		psaJ~rpl33	GGTGACGAAGATTAGAGATCCA	TTCCATTTCTGGTCTGACTCTT	228
VBCP130		TACCA		rpl2~rpl2	ACCTCTTCCCAAACTGTACAAG	AAGCCAGATGAAGGAACAGAAA	228
VBCP131		TACCC		trnY-GUA~trnE-UUC	ATTGCCAACGAATTTACAGTCC	CATAGTAGAATGGAAGTCGGGC	212
VBCP132		TACCT		trnS-GCU~trnM-CAU	ATCGTATATCATACGGTGCAGC	TGACCTACTTAACTCAGTGGTT	200
VBCP133		TAGGG		psaJ~rpl33	ATTTGGCCTCAGTGAAATTTGG	TTGACTACTACAATGCTTTCGAA	214
VBCP134		TATAA		psbB~petL	TGTTCGTCCGTAATAATTGATTCA	AGTCGTATCTTATTCAGACTGAGA	256
VBCP135				clpP~clpP	GTTGCCTGTTCTTTCGGAATAA	AATTGAAAGTAGAGCCGTATGC	266
VBCP136		TATAT		ycf3~ycf3	TATGGCCGTGATCTGTCATTAC	CTTTACGGTGCTTCCTCTATCA	268
VBCP137				trnL-UAG~rpl32	TCTAGTTCTGACTTCAATCCAGT	TGAATTAGCTCGATTCAAAGAGT	203
VBCP138		TATGC		psaA	TTTACAGGCCAGGGTCATAAAG	AGCAGCACCAACTATGAGAAAG	222
VBCP139		TATGT		rpl2	GATATCAAACGGACCTCTCCAG	CTTGTACAGTTTGGGAAGAGGT	211
VBCP140		TATTT		trnL-CAA~ycf2	TCAACGGCAATATGGATTCTCA	AACCCTATTGGCTCAAATCACA	213
VBCP141				psaC~ndhD	TGGCATGAAACAACTCGAAGTA	AAATTAAGGAACCTGCGGCTAT	237
VBCP142		TCGAA		psbT~psbB	GGGATTCTCTCCTGGATAAAGA	GATGCGCAAGTAGAATTTGGAG	220
VBCP143		TCGGG		trnL-CAA~ycf2	CCCTAAACCAACGGATAAAGTAC	AGCAAATAAAGAGATCCACGGG	254
VBCP144		TCTAA		rpoC1~rpoC1	TCCTCTCATCCGGCTAAAGTAT	TTTCTGTCGTAATTTCGAATTGCA	200
VBCP145		TCTAT		psbB~petL	AAACTATGCTATGGACCTTCCC	TGTATTCACTGATATAAACACGCA	202
VBCP146		TCTTG		ndhA	TGGGAGAAGTTGATCGTTGAAA	GTATTCAGGTCCAATACGCTGT	219
VBCP147		TCTTT		rps19~rpl2	TTTCGTGAACGTGTCATAGTTAA	ATTCTTCGTCGCCGTAGTAAAT	215
VBCP148		TGAAA		psbE~rps12	GTCGAGCTCCGCATATTCTTAT	ACGAAATCTTGTCACTGATTGT	202
VBCP149		TGATT		rpoC2	GGGACATTAGTTCGTTCTTTCG	ACCATGGATTCACTTTCTAATGGA	271
VBCP150		TGTAA		ndhK~ndhJ	AGTTCAGTATCCTCCAACGAAC	ACTATTCCGTGTTTGACTAGCC	205
VBCP151				rpl32~ndhF	AGCCGTATGTCTTATCTATCTGA	GAGCGAGGATGAGGATAAATAAGT	271
VBCP152		TTAAG		trnA-UGC~trnA-UGC	TGGAATCCCATTCAAACAAGGA	TTCAACCTGAGAACGCATTAGT	203
VBCP153		TTAGA		ycf1	GCAACCAGGAGACAATAGAAGT	ATACGCGAGGCAAGAAGATCTA	201
VBCP154		TTATC		ndhI	TGTTCCTTATGGTAACTGGGTT	CACATACTTCACAAGCAATGCA	210
VBCP155		TTATT		petN~psbM	GGGAAGAAGTGGACTCTAAAGG	GGCAACAATTTCAATATTTGTGTG	246
VBCP156		TTCAA		trnE-UUC~trnT-GGU	AAGAATTGAGTTGAGGGACAGG	ACATAGCAACTCATTAACGAACA	227
VBCP157		TTCCT		ycf1~trnN-GUU	ACGTCCAATTCATTGTTCCAAA	ACGAAGCAAATAAGAACGAAGAG	231
VBCP158		TTCTA		trnM-CAU~accD	GACAGTTTCCCTGATCTGGAAA	ATGGCCTTTCCTATACCTTCAC	203
VBCP159		TTCTG		trnN-GUU~trnR-ACG	CCGATTGGTCGTAGGTTCAAAT	ATAGGATAGCCCGAGACTGTAG	208
VBCP160		TTCTT		rpl23	GATTTCACTTGACTGTTGACGG	TAAAGGGTAGAAGAATGCGACC	204
VBCP161		TTGAA		ndhG~ndhE	TCTGTCGAATTCTATGTGAAGTGA	CTCTAACCATATTTCGGCTCGT	257
VBCP162		TTGAG		trnE-UUC~trnT-GGU	TTGTATTTCACACTAAGTCGGAAA	ACCGATTTGAATTGAAGTCATCT	203
VBCP163		TTGAT		trnL-UAA~trnL-UAA	CGGTATTGACATGTAGAATGGGA	AGAGACTCAATGGAAGCTGTTC	270
VBCP164		TTTAG		atpE~trnT-CGU	TAGGACACGAGTAGAGGCTATC	GTTCACATGTTTCGTAAAGGGC	235
VBCP165				trnT-UGU~rps4	TCGGATACTGATAGAATCTTTCCA	GGAGGCTCTTTACTGGTTAGTC	234
VBCP166				ndhB	TCGATGGTCTCCTGTAAGATCA	TTGTCGAGAACCCTTTGAATCA	205
VBCP167		TTTGA		rps3	TCGAATGGTTTGTAGAGGAACC	AGAGACCCTAATATTCTTGCAGA	207
VBCP168		TTTGG		psaB	TGGGCATTCTTCTTAGCAAGAA	AAGCTACATGGAAGAGATTCCC	272
VBCP169		TTTTA		trnT-UGU~rps4	GCATTTGTAATGCGATGGTCAT	TGGAAAGATTCTATCAGTATCCGA	218
VB+47:172CP170		TTTTC		ycf2	CTGTCGTTAAGGTAGAGAACTGA	CCAAATCCCATCAATCGAATCG	205
VBCP171	Hexa-	AAAAAG	2	petB~petB	TGAGATTCATACCATAACCACGA	TTCTATTTAGACCTCGCAACCG	235
VBCP172		AAAAAT		trnS-GCU~trnM-CAU	CCAACCAGAGTCTAGCTAGGTA	AGGTAAGGTATTGGTCGAACTT	274
VBCP173		AAAATG		ycf1	TCTTCTAACACGATTCGAAACCA	CACAATAAGGTACGATCTACTGAA	281
VBCP174		AAAGAA		ycf2	TGGTCCAAATGTTCCTGGAAAT	CGATTCAATCGCAACTTGGAAT	239
VBCP175				psbT~psbB	TCCTAAAGTCGAGACTAAGAGGA	AAACAGGGAGTCTGATAGAAGAA	257
VBCP176		AATGCT		start~psbA	TCTTCGAAGTTCTTACGAATCTTC	TCAACATTGTGGATATTACTCCCT	225
VBCP177		AATTAA		rpoB~trnC-GCA	CTTGGCTCCATGAGAGAAAGAT	AGCTGAAGTTAGATCTATGCATGT	205
VBCP178		ACTCTT		psbK~psbI	TTGAGTCTACCACCAATACGTG	ACGACAGAGAAAGAGAATAGATTC	206
VBCP179		AGCTAT		rpoB~trnC-GCA	TGAGCCCTTTACCATTTCAAGT	TATGCTGTCCCGAACAAATAGG	202
VBCP180		ATCATT		ycf2	CACAGGATCCTCTTGGAATAGC	AAGGGTCATTTCAGGACAAACA	212
VBCP181		ATCGGG		ycf3~ycf3	ACTCCACTAGTACCAATAGGCG	ACAATTTCTTTGTCCTCAACGC	234
VBCP182		ATGTAA		trnV-UAC~trnV-UAC	TGTATCCAAAGCATTAAGGGCT	CCATTCTGGATTCATTTGACGT	203
VBCP183		ATTCTA		ycf3~psaA	AAACAAGCTATAGCCCTTACCC	CAGTGAGGTGCTCAACGGAC	255
VBCP184		ATTTAA		psbA~trnK-UUU	ACCATCCAATGTAAAGACGGTT	ACAGGATACAGTGGATAGTGGT	247
VBCP185		ATTTAT		ycf2	AACCTCAGACCAATCAATCGAA	GAAACACACGATCAATCAACGT	253
VBCP186		CAGAAG		ndhA	GAATTTGTGGCGTCAACCTATG	TAGAACCGCCCAAGTAAAGAAC	221
VBCP187		CCAAAA		psbB	TGTACCCTTCCTGTTAGTCCAT	GGCTATTTGGCATTGGGTCTAT	207
VBCP188		CCAATT		atpA	TTGGGATTGTTTAAGCAACTCG	TATTCAATGCTGGGATCAGACC	230
VBCP189		CGCTTC		rrn23	CTGATCTTAGGCCCTGACTTAC	CCGAAGCTGTGGGATGTAAA	205
VBCP190		CGGGAG		atpA	CAATAATCAATTCTCGCTGGCC	TAAGTGAGGGTTATTTGGGTCG	210
VBCP191		CTCAAG		psbC	ACTAGTATGGTCTGGAGAAGCT	AACGCATAGTTTCTCCTCCAAA	284
VBCP192		CTTTCA		trnE-UUC~trnT-GGU	CGAAGTAATGCGAAAGAAACCA	CCTGTCCCTCAACTCAATTCTT	223
VBCP193		GAAAAA		clpP~clpP	TGATTCAGCAATCCCAAAGTTTC	TGGCGCCAATGATTCTTATTTG	257
VBCP194		GAATAT		rbcL~atpB	AATGACTGGGTTGACCTTGAAA	ACCTCAGTATCAGAAGGAGGAG	258
VBCP195		GACTCT		ndhB~ndhB	CATACGCGAGGAAGGAAATACT	GCCACTCGGTTGATGAGAAATA	244
VBCP196		GAGGAA		accD	GAGTTACGTCGTTCTAGTGAGG	TACCATTTAGTTGACCTGTGCC	202
VBCP197		GGAATT		ndhD	ACTACTTTAGCCACTTTAGCGG	TAAACCGATACCCAGAATTCCC	273
VBCP198		GGTATT		ndhD	ACGGCAGATGTTCTATGGATAC	TTTCAGTGAATCGAACGGAAA	252
VBCP199		GGTTTT		rrn5~rrn4.5	CATTGTGAGTGTGAGGTCCTAA	TCAAGTGGAAGTGCAGTAATGT	243
VBCP200		GTAAAA		psbE~rps12	ACGAACAAATTCAAACTTGATTGA	CGATAATCTCCCACTTCTTCCC	255
VBCP201		TAAAGA		rpoC1~rpoC1	TTTAACTACGGGCCTAGCAAA	TCAATGAAATGTTGCTTGGTCT	231
VBCP202		TAAATG		ycf1	AGGCTTGTGACAAAGAAGATACA	TCAGGTATCTACAACGTGTTCG	219
VBCP203		TAAGTA		rpl20~rps12	ACAACATGGATTCTTCGAATGT	GGACCTCACCGTTTAACAAGTA	229
VBCP204		TAGGGA		trnW-CCA~trnP-UGG	GCCAATACATCTTGCATGCATA	ACTGATGTAAAGGGATGTAGCG	222
VBCP205		TAGTAT		trnL-UAG~rpl32	TCTAGTTCTGACTTCAATCCAGT	TGAATTAGCTCGATTCAAAGAGT	203
VBCP206		TATATG		ndhJ	GGCTAGTCAAACACGGAATAGT	TTATGCATACCTCTTCGGGTTG	237
VBCP207		TATCAA		ycf1	CTGAAACGGCTTCCATTATGTG	CTAGACGCCGTAGAGAATTGAG	262
VBCP208		TATTGA		ycf2	TAATTGAAGATCTCGAGCGGAC	TGACAGGGCTTCTTCCTATACA	218
VBCP209		TATTTC		trnK-UUU~rbcL	ACGACTTGTTTAGTAGAGTACTCT	AATCCGATCGTGAATCAATGGA	211
VBCP210		TCAAAT		psbT~psbB	GGGATTCTCTCCTGGATAAAGA	GATGCGCAAGTAGAATTTGGAG	220
VBCP211		TCAATT		petN~psbM	GTCCCGGGAGTACAGATAATTG	TTGTATTGGTTCCAATCAATCTGA	221
VBCP212		TCAGTG		rrn16	ATACGCACAGCCACTTAGTATC	TACCAAGCTAGAGTACGGTAGG	200
VBCP213		TCCAAT		rpoC2	ATAACACAATCGGCAGATCCAA	TTCTGTAAACACCCGAAATGGA	229
VBCP214		TCCGTC		psbB	GTTCGCCACCATAGAATTCAAC	TGGACAATGGAGATGGAATAGC	228
VBCP215		TCGTAA		rpoC1	CCGCTCCACTAGAAATTTCTCT	ATACTTTAGCCGGATGAGAGGA	236
VBCP216		TCTAAT		ycf4~cemA	CTTGGGACTTGTCCAGATTCTT	AAGCCATTGCCAATTTGAATGA	205
VBCP217		TCTTTT		ycf1	TACGTCCAATTCGTCGACTAAG	TGACGGACTTTATTTATTTCCAGA	205
VBCP218		TGAATA		atpF~atpH	GCGCATCTCCTCTTATGGATAG	GGGAATCTTTCAATTGACTAACCA	212
VBCP219		TGTGAG		rrn5~rrn4.5	AGAGTTTAACCACCAAGTTCGG	TGTTCAACTCTTTGACAACATGA	241
VBCP220		TGTTTA		ycf1	TCAATTCCTCTCTGTCCCTACA	TATTTGGACTGTAAGACTCCCG	202
VBCP221		TTAAAC		rrn16~petD	CACTCTACCGCTGAGTTATACC	TGCTCAAATCCATAGTCAATCCT	224
VBCP222		TTAGAC		petG~trnW-CCA	TGGCGATCAGTTGGATATTTGA	AAGAAAGCGCTCTTAGTTCAGT	245
VBCP223		TTCGTT		cemA~petA	AATAGTGTATCTCCGTCGCTTG	AAGATTAGGTAGGGTACTGGCA	230
VBCP224		TTCTCT		psbK~psbI	AAGGCTCAACTCTTACTCTTACT	GGATTACGTCCTGGATCATTAGA	256
VBCP225		TTTAAA		rps8	ATTCTTTCGAATCGAGCCTCTC	ACATCGAGAAAGCAACAAATACT	225
VBCP226		TTTCCA		rpoC2	GGCCTCCTCAATAGAAGAACTT	TCTATGAAATACCGGACAGTATCA	215
VBCP227		TTTTAG		rpoC2	CATAATGGCCGTGAATGGTTG	TGAATCCATTCCATTTGAATTGGT	237
VBCP228		TTTTTC		trnI-GAU~trnI-GAU	CTCCCATTTCGAGTCAAGAGAA	TTTCTATTCACTCGTGGGATCC	250
VBCP229	Complex repeated motifs	ATT/T	4/10	ycf3~ycf3	AGACCTTTACCATTGTAGCCAA	GGAATACACGACAGAAGGGATT	245
VBCP230		T/TTTCT	13/2	rpoC2	CGGTATCAAGATGGCACTATGT	ACCCAAATCTTCTTCCCTAATGG	205
VBCP231		TAAAA/A	2/11	rpoC1~rpoC1	GTATGCCACGATGTCTTAAAGC	GGGAATGGGTCTATGGTCAATT	206
VBCP232		TTCATT/TTCTA	2/2	rpl36~rps8	ACCGGTCGTATCCAGTAAGTAT	AACTTAGAGACAACATTCTTGTGA	236
