# Supplementary material for: Complete Chloroplast Genome of the Inverted Repeat-Lacking Species Vicia bungei and Development of Polymorphic Simple Sequence Repeat Markers
Source: Frontiers journal article supplement (doi:10.3389/fpls.2022.891783), 2022-05-16
Supplement: Table_1.xlsx [file Table_1.xlsx]

## Sheet: Sheet1
Table S1. List of Vicia species and accessions used in this study
Accession no.	Species	Agency in possession	Origin
1	V. angustifolia var. segetilis_1	RDA genebanka	KOR
2	V. angustifolia var. segetilis_2	RDA genebank
3	V. angustifolia var. segetilis_3	RDA genebank
4	V. bungei_1	RDA genebank
5	V. bungei_2	RDA genebank
6	V. bungei_3	RDA genebank
7	V. chosenensis_1	RDA genebank
8	V. chosenensis_2	RDA genebank
9	V. chosenensis_3	RDA genebank
10	V. dasycarpa_1	RDA genebank
11	V. dasycarpa_2	RDA genebank
12	V. dasycarpa_3	RDA genebank
13	V. hirsuta_1	RDA genebank
14	V. hirsuta_2	RDA genebank
15	V. hirsuta_3	RDA genebank
16	V. linearifolia_1	RDA genebank
17	V. linearifolia_2	RDA genebank
18	V. narbonensis_1	USDA‐ARSb	TUR
19	V. narbonensis_2	USDA‐ARSb
20	V. narbonensis_3	USDA‐ARSb
aThe Rural Development Administration (RDA) Gene Bank, Republic of Korea.
bThe United States Department of Agriculture (USDA). Agricultural Research Service (ARS).
